## 1 **Cancer cell elimination by cytotoxic T cell cooperation and additive damage**

2  
3 Bettina Weigelin<sup>1,2,3</sup>, Annemieke Th. den Boer<sup>4</sup> Esther Wagena<sup>1</sup>, Kelly Broen<sup>5</sup>, Harry Dolstra<sup>5</sup>,  
4 Rob J de Boer<sup>6</sup>, Carl G. Figdor<sup>7</sup>, Johannes Textor<sup>7</sup>, and Peter Friedl<sup>1,2,8</sup>

5  
6 <sup>1</sup> Department of Cell Biology, RIMLS, Radboud University Medical Center, Nijmegen, The  
7 Netherlands

8 <sup>2</sup> David H. Koch Center for Applied Research of Genitourinary Cancers, Department of  
9 Genitourinary Medical Oncology, The University of Texas MD Anderson Cancer Center,  
10 Houston, USA

11 <sup>3</sup> Department of Preclinical Imaging and Radiopharmacy, Eberhard Karls University Tübingen,  
12 Germany

13 <sup>4</sup> Department of Internal Medicine, Maastricht University, Maastricht, The Netherlands

14 <sup>5</sup> Department of Laboratory Medicine – Laboratory of Hematology, Radboud University Medical  
15 Center, Nijmegen, The Netherlands

16 <sup>6</sup> Theoretical Biology & Bioinformatics, Utrecht University, The Netherlands

17 <sup>7</sup> Department of Tumor Immunology, RIMLS, Radboud University Medical Centre, Nijmegen,  
18 The Netherlands

19 <sup>8</sup> Cancer Genomics Centre Netherlands (CGC.nl)

20

## 21 **Summary**

22  
23 **Cytotoxic T lymphocytes (CTL) eliminate tumor target cells in an antigen and cell-contact**  
24 **dependent manner. Lethal hit delivery occurs as a rapid and binary, “yes/no” process when**  
25 **immunogenicity is very high<sup>1–3</sup>, however *in vivo* CTL often fail to kill solid tumor cells**  
26 **during 1:1 conjugations<sup>4–6</sup>. Using long-term time-lapse microscopy in three distinct tumor**  
27 **cytotoxicity models and statistical modeling, we here show that migrating CTL transit**  
28 **between target cells and initiate apoptosis by a series of sublethal interactions (‘additive**  
29 **cytotoxicity’), while individual conjugations rarely induced apoptosis. Sublethal damage**  
30 **included perforin-dependent membrane pore formation, nuclear lamina rupture and DNA**  
31 **damage, and these events resolved within minutes to hours. In immunogenic B16F10**  
32 **melanoma tumors *in vivo*, frequent serial engagements and sublethal hit delivery of CTL**  
33 **was largely confined to interstitial niches in the invasion front, resulting in eradication of**  
34 **invading tumor cells. Thus, additive cytotoxicity is a probabilistic process achieved by a**  
35 **series of CTL-target cell engagements and sublethal events. The need for additive “hits”**

36 **has implications for the topographic mechanisms of elimination or immune evasion of**  
37 **tumor cells and microenvironmental regulation of CTL accumulation and cooperation by**  
38 **targeted therapy.**

39 Cytotoxic T lymphocytes and NK cells can bind to and attack more than one target cell, termed  
40 “serial killing”<sup>7-9</sup>. Estimations from bulk killing assays and mathematical modeling suggest, that  
41 single CTL are capable of eliminating up to 20 target cells of the hematopoietic lineage per day  
42 both *in vitro* and *in vivo*<sup>10,11</sup>. This high efficacy of CTL-mediated serial killing, however, has not  
43 translated to the killing of solid tumors in mice<sup>4,5,12</sup> and, likewise, is rarely observed in patients  
44 receiving adoptive transfer of tumor-specific TCR-engineered or CAR T cells<sup>13</sup>. To understand  
45 the discrepancy between CTL effector function against model target cell lines and solid tumors,  
46 we quantified the killing kinetics of single CTL in solid tumor models in 3D collagen-matrix  
47 based organotypic culture and the mouse dermis *in vivo*<sup>14</sup>. In these 3D environments, CTL  
48 mediated target cell killing depends on CTL motility and transient tumor interactions, not unlike  
49 kinetic priming models for CTL activation<sup>15</sup>.

#### 50 **Serial conjugation and effector function**

51 *In vitro* activated OVA-specific OT1 CTLs were confronted with transformed mouse embryonic  
52 fibroblasts expressing the OVA peptide (MEC-1/OVA) and the co-stimulatory molecule B7.1<sup>13</sup>.  
53 In contrast to tumor cells that evolved *in vivo*, this engineered model lacks natural immune  
54 escape modifications (e.g. down regulation of MHC-I or apoptosis resistance) and, thus,  
55 represents an idealized model for maximized CTL efficacy at a single cell level. After 30 h of co-  
56 culture, killing efficacy was near 100% at high effector-target (ET) ratios and reached  
57 background level below ET ratios of 1:128 (**Extended Data Fig. 1a**). To assess the serial killing  
58 efficacy of individual CTL, we analyzed antigen-specific CTL-target cell interactions and  
59 outcome in long-term time-lapse microscopy recordings by tracing individual CTL during  
60 interaction with target cells. The duration of individual CTL-target cell interactions was variable  
61 (lasting minutes to hours), with lag times between initial CTL binding and target cell death  
62 lasting  $1.8 \pm 1.5$  h, and was followed by a subsequent period of ongoing CTL engagement with  
63 the dead cell body (‘necrophilic phase’) (**Extended Data Fig. 1 b-d**). This extended lag phase  
64 until apoptosis differs from lag phases obtained for CTL-mediated killing of target cells from  
65 leukocyte lineages, lasting <5 to 25 min<sup>1-3</sup>. In regions of low local CTL density, repetitive

66 contacts resulted in the serial killing of multiple neighboring target cells by a single CTL (**Fig.**  
67 **1a; Movie 1**). On the population level, 50% of the CTL acted as serial killers (maximum of 11  
68 killed target cells/24 h), whereas a small CTL subset (15%) repeatedly contacted target cells  
69 without inducing apoptosis (**Extended Data Fig. 1e**). The percentage of CTL with killing  
70 capacity correlated with the surface expression of Lamp-1 by 85% of CTL, indicating  
71 recognition of the target cells and lytic vesicle exocytosis by the majority of CTL (**Fig. 1b**). The  
72 lag phase to apoptosis was neither compromised nor accelerated over consecutive killing events  
73 (**Fig. 1c**), which resulted in a consistent eradication frequency of 1 kill every 2 hours (**Extended**  
74 **Data Fig. 1f**). This excludes gain of cytotoxicity by kinetic priming through repetitive antigenic  
75 interactions. Thus, OT1 CTL serially eliminate highly immunogenic target cells over 24 h and in  
76 a non-exhaustive manner.

### 77 **CTL induce sublethal damage**

78 To compare effector function against solid tumor cells, which typically retain resistance to CTL  
79 mediated killing, OT1 CTL were confronted with mouse melanoma B16F10 cells expressing the  
80 OVA peptide (B16F10/OVA) (**Extended Data Fig. 2 a-d; Movie 2**). As a second model, IL-2  
81 activated human SMCY.A2 CTL<sup>14</sup>, which recognize an HLA-A2 restricted antigen encoded on  
82 the y chromosome, were confronted with male human melanoma cell lines BLM or MV3  
83 (**Extended Data Fig. 2 e-i; Movie 3**). Compared to the MEC-1/OVA cells, these three  
84 melanoma models show delayed, but ultimately effective target cell elimination at the end-point  
85 after 24 hours, whereas OVA-negative B16F10 or female MCF-7 cells survived (**Fig. 1e**). Thus,  
86 the endpoints of both murine and human models for probing CTL effector function show  
87 comparable target cell elimination in 3D culture. Notably, across all cell types tested, only a  
88 minority of individual CTL-target cell contacts induced apoptosis at first encounter, while 60-  
89 70% (MEC-1/OVA, BLM) or >90% (B16F10/OVA, MV3) of individual conjugations were  
90 followed by target cell survival (**Fig. 1e**).

91 CTL degranulation induces transient perforin-mediated pores in the target cell membrane, which  
92 facilitates diffusion of extracellular factors into the target cell, including CTL-derived granzyme  
93 B<sup>16</sup> and extracellular calcium<sup>17</sup>. OT1 CTL deficient in perforin expression failed to kill  
94 B16F10/OVA cells in organotypic culture (**Extended Data Fig. 2j**), while CTL effector function  
95 remained intact after interference with Fas–FasL interaction (**Extended Data Fig. 2k**). Further,

96 adding perforin-deficient OT1 CTL to a fixed number of wt OT1 CTL did not increase killing  
97 efficiency, indicating that perforin-independent mechanisms delivered by excess CTL, including  
98 soluble mediators, do not induce or enhance cytotoxicity against B16F10/OVA cells (**Extended**  
99 **Data Fig. 2l**). Thus, elimination of B16F10/OVA cells by OT1 CTL in 3D culture critically  
100 depends on perforin.

101 To visualize perforin-pore formation and to discriminate sublethal cytotoxic hits from  
102 functionally inert interactions, MEC-1/OVA and B16F10/OVA cells were engineered to express  
103 the calcium sensor GCaMP6s<sup>18</sup>, and monitored for transient Ca<sup>2+</sup> influx through perforin pores  
104 (**Fig. 2a, panel 1; Extended Data Fig. 3a; Movie 4**). A substantial fraction of antigen-specific  
105 but non-lethal CTL-target cell contacts showed CTL associated intracellular Ca<sup>2+</sup> events in  
106 B16F10/OVA cells (40%; **Fig. 2b, panel 2**), which were transient (median: 30 s; **Fig. 2c**) and in  
107 90% followed by target cell survival (**Fig. 2d**). Ca<sup>2+</sup> events originated at CTL – tumor cell  
108 contact regions, and differed from unspecific intracellular Ca<sup>2+</sup> fluctuations by signal intensity  
109 and duration (**Extended Data Fig. 3 b,c**).

110 To test whether the variability of perforin release and consecutive Ca<sup>2+</sup> events in B16F10/OVA  
111 cells were a consequence of heterogeneous TCR engagement, we quantified Ca<sup>2+</sup> signals in OT1  
112 CTL upon target cell contact. OT1 CTL showed comparably high rates of Ca<sup>2+</sup> signaling when  
113 contacting MEC-1/OVA and B16F10/OVA cells (80% to 85%), typically within seconds after  
114 contact initiation (**Extended Data Fig. 3 d**). When co-registered with Ca<sup>2+</sup> events in target cells,  
115 40% of Ca<sup>2+</sup> positive-CTL contacts with B16F10/OVA coincided with, or were immediately  
116 followed by a Ca<sup>2+</sup> event in the target cell (**Extended Data Fig. 3 e,f**). In conclusion, while TCR  
117 triggering in OT1 CTL occurs reliably, the induction of perforin-events in the target cell varied.

### 118 **Structural damage in target cells**

119 To address whether transient transmembrane pores were associated with structural intracellular  
120 damage, B16F10/OVA cells were engineered to express NLS-GFP<sup>19</sup> or 53BP1trunc-Apple<sup>20</sup>.  
121 NLS-GFP leakage into the cytoplasm was detected in 25% of CTL-target cell contacts and  
122 absent when CTL lacked perforin expression (**Fig. 2a, panel 2; b, Extended Data Fig. 3 g-j;**  
123 **Movie 5**). Recovery, as indicated by diminishing NLS-GFP signal in the cytosol and recovery in  
124 the nucleus, occurred in 75% of events within minutes to hours (median: 49 min; **Fig. 2 c,d**).  
125 53BP1 initiates DNA damage repair complexes, which can be visualized as repair foci by

126 53BP1trunc-Apple<sup>20</sup> (**Extended Fig. 3 k; Movie 6**). 53BP1 foci were induced in 35% of CTL  
127 contacts, in dependence of perforin expression in OT1 CTL (**Fig. 2 a,b**) and CTL density  
128 (**Extended Fig. 3 l,m**). CTL-induced 53BP1 foci persisted for several hours (median: 4 h) and  
129 were resolved in 73% of events (**Fig. 2 c,d**). These data indicate that CTL contacts induce  
130 reversible sublethal damage to the nuclear lamina and DNA.

### 131 **Death induction by multiple CTL**

132 Across all tested tumor models, sequential or simultaneous contacts by multiple CTL with the  
133 same target cell occurred before target cell death (**Fig. 3a**). In the B16F10 model, >90% of  
134 successful kills were preceded by 2-9 CTL encounters by distinct CTL (**Extended Data Fig. 4a**).  
135 When Ca<sup>2+</sup> events in target cells were recorded, death induction was preceded by serial Ca<sup>2+</sup>  
136 events with variable onset and frequency between hits (**Fig. 3b; Movie 4, 7**). The lag time  
137 between contact initiation and first Ca<sup>2+</sup> event was 6 min in MEC-1/OVA cells and 16 min in  
138 B16F10/OVA cells (**Extended Data Fig. 4b**). Killing of the MEC-1/OVA cells was preceded by  
139 Ca<sup>2+</sup> events with 5 min median interval, while Ca<sup>2+</sup> events in B16F10/OVA cells occurred with  
140 longer intervals of 20 min (**Extended Data Fig. 4c**). While >50% of contacts induced only one  
141 Ca<sup>2+</sup> event in B16F10/OVA cells, in 40% of CTL contacts yielded at least 2 repetitive Ca<sup>2+</sup>  
142 events (**Extended Data Fig. 4d**). Thus, compared to MEC-1/OVA cells, delayed killing of  
143 B16F10/OVA cells correlated with delayed delivery of Ca<sup>2+</sup> events (**Extended Data Fig. 4e**).

### 144 **Additive cytotoxicity**

145 We then addressed whether apoptosis could have been induced by rare deadly CTL hits  
146 ('stochastic killing') instead of sublethal contacts that add up over time ('additive cytotoxicity').  
147 Therefore, we analyzed whether the lethality of the final hit was enhanced by, or independent of,  
148 previous Ca<sup>2+</sup> events, by plotting the lag time to apoptosis and target cell survival probability in  
149 relation to the number of pre-final Ca<sup>2+</sup> events. Target cells which received two or more hits  
150 prior to the lethal one showed accelerated apoptosis induction, together with a sharp decrease in  
151 survival probability (**Fig. 3c; Extended Data Fig. 5a,b**). The dependence of the lag time to  
152 apoptosis on prior CTL hits is expected when additive effects exists, but it is inconsistent with  
153 the stochastic killing hypothesis. To explore stochastic killing directly, we performed the same  
154 analysis on simulated data, using randomly swapped times between hits and between the last hit  
155 and apoptosis. Here, cell death induction was gradual, and neither the lag time to apoptosis nor  
156 the survival probability was dependent on the number of prior hits (**Fig. 3d**).

157 To address how long sublethal events remain relevant, we estimated the time required to repair  
158 the damage caused by a single  $\text{Ca}^{2+}$  hit, using a Cox regression model based on additive killing.  
159 This resulted in an estimated damage half-life of 56.7 minutes (95% CI: 33.1-112.2) of  $\text{Ca}^{2+}$   
160 events to contribute to lethal outcome. This interval was consistent with the recovery kinetics of  
161 nuclear lamina defects (**Fig. 2c**). Using the Bayesian Information Criterion (BIC) to compare  
162 model fits, showed that the model which integrates serial damage and decay explained the data  
163 better (BIC difference >10) than a model based on the number of  $\text{Ca}^{2+}$  events alone.

#### 164 **Multi-hit delivery as a function of CTL density**

165 To test whether apoptosis induction under conditions of high CTL density facilitated additive,  
166 multi-hit interactions or, instead, a higher probability of lethal single-hit interactions of few  
167 CTL<sup>21</sup>, we titrated CTL density and monitored individual CTL-target cell interactions by time-  
168 lapse microscopy. At high CTL density (ET 1:2) target cell death was frequent and preceded by  
169 multiple CTL interactions (**Fig. 3e**), whereas at low CTL density (ET 1:16) infrequent apoptotic  
170 events were near-exclusively preceded by single-contact engagements (**Fig. 3e**). The CTL  
171 density effect was not enhanced by the addition of perforin-deficient CTL (**Extended Data Fig.**  
172 **2l**). This indicates that high CTL density (“swarming”) enables efficient apoptosis induction by  
173 favoring serial perforin-dependent hits, whereas the poor killing at low CTL density largely  
174 relies upon single encounters.

#### 175 **Sublethal hit delivery *in vivo***

176 To address whether multiple encounters by CTL mediate anti-tumor cytotoxicity *in vivo*,  
177 activated OT1 CTL were adoptively transferred into C57BL/6 J mice bearing intradermal  
178 B16F10 melanoma and monitored longitudinally by intravital microscopy through a skin  
179 window (**Extended Data Fig. 6 a, b**). A single application of OT1 CTL caused a transient, dose-  
180 dependent growth delay of the OVA antigen-expressing but not of control tumors (**Extended**  
181 **Data Fig. 6c**). B16F10 tumors invade the dermis as multi-cellular strands<sup>22</sup>. Concomitantly, OT1  
182 CTL first accumulated in the tumor periphery and subsequently redistributed towards the  
183 invasive tumor front (**Fig. 4a**). This resulted in local ET ratios of 1:1 along the tumor-stroma  
184 interface, whereas ET ratios in the tumor core remained below 1:250 (**Extended Data Fig. 6**  
185 **d,e**). To identify where and by which contact mechanism eradication of tumor cells was  
186 achieved, CTL contacts and outcome were mapped using histone-2B/mCherry (H2B/mCherry)

187 to detect nuclear fragmentation in B16F10/OVA cells<sup>23</sup>. Despite comparable ET ratios, high  
188 fragmentation rates occurred in the invasion niche but not the tumor rim (**Fig. 4b**). In either zone,  
189 >95% of CTL contacts were transient, short-lived (median duration 15 min) and non-lethal (**Fig.**  
190 **4c**). When aggregated, >86% of apoptotic events were preceded by multiple CTL contacts, and a  
191 minority (<14%) by individual CTL conjugation (**Fig. 4d**). In the tumor invasion niche, high  
192 local CTL density coincided with confined migration along tissue structures with enhanced speed  
193 compared to the main tumor mass (**Extended Data Fig. 7a, b; Movie 8**). This supported  
194 frequent contacts to B16F10/OVA cells with cumulative contact duration reaching >1h and  
195 nuclear fragmentation in tumor cells in a time-dependent manner (**Fig. 4e, Movie 9**).

196 To discriminate functional from non-functional, irrelevant interactions, we analyzed the  
197 occurrence of Ca<sup>2+</sup> events using GCaMP6s expressing tumors. Most Ca<sup>2+</sup> events (80%) in  
198 B16F10/OVA cells were associated with CTL contacts, but rare without interacting CTL  
199 (**Extended Data Fig. 7 c,d**). In invasive tumor subregions with high apoptosis rates, the  
200 frequency of CTL contacts inducing Ca<sup>2+</sup> events was 5-fold increased, compared to the non-  
201 invading tumor rim (**Fig. 4 g,h; Movie 10, 11**). Thus, *in vivo* eradication of tumor regions by  
202 CTL is a function of local CTL density and frequent sublethal interactions.

## 203 **Conclusions**

204 Compared with the deterministic and reliable elimination of B cells<sup>1-3</sup>, CTL effector function  
205 against solid tumor cells is inefficient, with a high failure rate, and rarely completed by a single  
206 CTL but dependent on a sequence of sublethal hits. Consequently, apoptosis induction is not a  
207 binary event but instead implies the probabilistic accumulation of a death signal within the target  
208 cell over time, not unlike the accumulation of activation signal in naïve T cells by successive  
209 encounters with APCs<sup>24-26</sup>. The reversible structural damage in the plasma and nuclear  
210 membrane and DNA integrity induced by CTL resembles damages induced by chemical and  
211 mechanical assault<sup>19,27,28</sup> which are also incremental with challenge and reversible by repair.  
212 Thus, irrelevant interactions may alternate with variably damaging events and become integrated  
213 over time in the target cell until apoptosis is induced or recovery achieved (**Extended Data Fig.**  
214 **9**). Additive cytotoxicity may provide a mechanism by which dense CTL infiltrates induce  
215 apoptosis in a viral infection model<sup>29</sup> or, here, the tumor invasion zone. Alternatively, inefficient  
216 sublethal hit delivery may explain failed eradication despite high CTL numbers in solid tumors

217 in mice<sup>5</sup>, during alloimmune response against transplants<sup>30</sup> or, here, subregions of the tumor  
218 margin.

219 CTL density control may, thus, provide a filter limiting accidental cell damage by single, miss-  
220 targeted CTL. Additive cytotoxicity may enable cooperation of CTL with differing TCR-  
221 specificity or different cytotoxic recognition strategies, such as CTL and NK cells. Lethal hit  
222 delivery by serial CTL engagements, as gradual, tunable process, may further respond to  
223 microenvironmental and therapeutic immunomodulation, including stabilization of CTL-target  
224 cell contacts<sup>31,32</sup>, modulating local concentration of soluble factors<sup>33</sup>, activation of  
225 immunostimulatory pathways<sup>34</sup> and/or blockade of immune checkpoints<sup>35</sup>. In conclusion, serial  
226 conjugation and delivery of sublethal hits define the efficacy of CTL effector function which can  
227 be exploited by targeted therapy to increase both single contact efficacy and CTL cooperativity.

228

## 229 **Methods summary**

230 **Organotypic three-dimensional cytotoxicity assay and time lapse microscopy.** Sub-confluent  
231 target cell monolayers were overlaid with 3D fibrillar collagen (PureCol, concentration: 1.7  
232 mg/ml) containing *in vitro* activated OT1 CTL (cell models and activation protocols described in  
233 the Methods section). CTL migration, interactions with target cells and apoptosis induction was  
234 monitored by time-lapse bright-field microscopy frame intervals of 30 sec for 24 h followed by  
235 manual cell tracking and quantitative population analysis.

236 **Monitoring sublethal damage.** Target cells were lentivirally transduced to stably express the  
237 calcium sensor GCaMP6<sup>17</sup>, NLS-GFP<sup>19</sup> or 53BP1trunc-Apple<sup>36</sup>. OT1 CTL-target cell  
238 conjugation and consecutive reporter activity were coregistered by confocal 3D time-lapse  
239 microscopy (Leica SP8 SMD) at 488 nm and 561 nm excitation (both 0.05 mW) at frame  
240 intervals ranging from seconds to minutes and total observation periods of up to 30 h  
241 (GCaMP6s: 10 sec/12 h; NLS-GFP: 2 min/30 h; 53BP1: 5 min/40 h). Intravital microscopy of  
242 GCaMP6s activity was performed by simultaneous scanning with 910 nm (eGFP and Alexa750,  
243 15 mW) and 1140 nm (mCherry, dsRed and SHG, 30 mW) with a sampling rate of 1 frame / 10-  
244 15 sec over periods of 1-2 h. CTL position and reporter activity were obtained by manual or  
245 semi-automated image segmentation and quantification using ImageJ/FIJI.



246 **Intravital multiphoton microscopy.** Histone-2B/mCherry expressing B16F10/OVA melanoma  
247 cells ( $1 \times 10^5$ ) were injected into the deep dermis of C57/B16 J mice (Charles River) carrying a  
248 dorsal skin-fold chamber and were repeatedly monitored for up to 15 days<sup>28</sup>. With the onset of  
249 tumor invasion and angiogenesis at day 3 after implantation, *in vitro* activated eGFP or dsRed  
250 OT1 CTLs ( $0.5\text{--}1 \times 10^6$ ) were injected intravenously. Multi-parameter intravital multiphoton  
251 microscopy was performed on anesthetized mice (1-3% isoflurane in oxygen) on a temperature-  
252 controlled stage (37°C) recording up to 5 channels simultaneously to visualize blood vasculature  
253 (70kD dextran/ AlexaFluor750) and peri-tumor stroma (SHG).

254 **Statistical modeling.** Survival curves of target cells receiving serial  $\text{Ca}^{2+}$  events were computed  
255 in GNU R using the 'survival' and 'rms' packages.

256 **Statistical analysis.** Unpaired student's t-tests or Mann-Whitney U-tests, as appropriate, were  
257 applied using GraphPad Prism 8.

258

## 259 Reference list

- 260 1. Stinchcombe, J. C., Bossi, G., Booth, S. & Griffiths, G. M. The immunological synapse of CTL  
261 contains a secretory domain and membrane bridges. *Immunity* **15**, 751–61 (2001).
- 262 2. Mempel, T. R. *et al.* Regulatory T cells reversibly suppress cytotoxic T cell function independent of  
263 effector differentiation. *Immunity* **25**, 129–41 (2006).
- 264 3. Purbhoo, M. a, Irvine, D. J., Huppa, J. B. & Davis, M. M. T cell killing does not require the  
265 formation of a stable mature immunological synapse. *Nat. Immunol.* **5**, 524–30 (2004).
- 266 4. Breart, B., Lemaître, F., Celli, S. & Bousso, P. Two-photon imaging of intratumoral CD8+ T cell  
267 cytotoxic activity during adoptive T cell therapy in mice. *J. Clin. Invest.* **118**, 1390–7 (2008).
- 268 5. Engelhardt, J. J. *et al.* Marginating dendritic cells of the tumor microenvironment cross-present  
269 tumor antigens and stably engage tumor-specific T cells. *Cancer Cell* **21**, 402–17 (2012).
- 270 6. Boissonnas, A., Fetler, L., Zeelenberg, I. S., Hugues, S. & Amigorena, S. In vivo imaging of cytotoxic  
271 T cell infiltration and elimination of a solid tumor. *J. Exp. Med.* **204**, 345–56 (2007).
- 272 7. Choi, P. J. & Mitchison, T. J. Imaging burst kinetics and spatial coordination during serial killing by  
273 single natural killer cells. **2013**, (2013).
- 274 8. Wiedemann, A., Depoil, D., Faroudi, M. & Valitutti, S. Cytotoxic T lymphocytes kill multiple targets  
275 simultaneously via spatiotemporal uncoupling of lytic and stimulatory synapses. *Proc. Natl. Acad.*  
276 *Sci. U. S. A.* **103**, 10985–90 (2006).
- 277 9. Isaaz, S., Baetz, K., Olsen, K., Podack, E. & Griffiths, G. M. Serial killing by cytotoxic T lymphocytes:  
278 T cell receptor triggers degranulation, re-filling of the lytic granules and secretion of lytic proteins  
279 via a non-granule pathway. *Eur. J. Immunol.* **25**, 1071–9 (1995).
- 280 10. Regoes, R. R., Yates, A. & Antia, R. Mathematical models of cytotoxic T-lymphocyte killing.  
281 *Immunol. Cell Biol.* **85**, 274–9 (2007).

- 282 11. Ganusov, V. V & De Boer, R. J. Estimating in vivo death rates of targets due to CD8 T-cell-  
283 mediated killing. *J. Virol.* **82**, 11749–57 (2008).
- 284 12. Boissonnas, A., Licata, F. & Network, C. T Cells Are Trapped in the Tumor-Dendritic. **15**, 85–94  
285 (2013).
- 286 13. Schmidts, A. & Maus, M. V. Making CAR T cells a solid option for solid tumors. *Front. Immunol.* **9**,  
287 1–10 (2018).
- 288 14. Weigelin, B. & Friedl, P. A three-dimensional organotypic assay to measure target cell killing by  
289 cytotoxic T lymphocytes. *Biochem. Pharmacol.* **80**, 2087–91 (2010).
- 290 15. Valitutti, S. The Serial Engagement Model 17 Years After: From TCR Triggering to  
291 Immunotherapy. *Front. Immunol.* **3**, 272 (2012).
- 292 16. Voskoboinik, I., Whisstock, J. C. & Trapani, J. A. Perforin and granzymes: Function, dysfunction  
293 and human pathology. *Nat. Rev. Immunol.* **15**, 388–400 (2015).
- 294 17. Lopez, J. a. *et al.* Perforin forms transient pores on the target cell plasma membrane to facilitate  
295 rapid access of granzymes during killer cell attack. *Blood* **121**, 2659–68 (2013).
- 296 18. Chen, T.-W. *et al.* Ultrasensitive fluorescent proteins for imaging neuronal activity. *Nature* **499**,  
297 295–300 (2013).
- 298 19. Denais, C. M. *et al.* Nuclear envelope rupture and repair during cancer cell migration. *Science* (80-  
299 .). (2016). doi:10.1126/science.aad7297
- 300 20. Yang, K. S., Kohler, R. H., Landon, M., Giedt, R. & Weissleder, R. Single cell resolution in vivo  
301 imaging of DNA damage following PARP inhibition. *Sci. Rep.* **5**, 10129 (2015).
- 302 21. Budhu, S. *et al.* CD8+ T cell concentration determines their efficiency in killing cognate antigen-  
303 expressing syngeneic mammalian cells in vitro and in mouse tissues. *J. Exp. Med.* **207**, 223–35  
304 (2010).
- 305 22. Weigelin, B., Bakker, G.-J. & Friedl, P. Intravital third harmonic generation microscopy of  
306 collective melanoma cell invasion: Principles of interface guidance and microvesicle dynamics.  
307 *IntraVital* **1**, 9–20 (2012).
- 308 23. Weigelin, B. *et al.* Focusing and sustaining the antitumor CTL effector killer response by agonist  
309 anti-CD137 mAb. *Proc. Natl. Acad. Sci. U. S. A.* (2015). doi:10.1073/pnas.1506357112
- 310 24. Friedl, P. & Gunzer, M. Interaction of T cells with APCs: the serial encounter model. *Trends*  
311 *Immunol.* **22**, 187–91 (2001).
- 312 25. Marangoni, F. *et al.* The Transcription Factor NFAT Exhibits Signal Memory during Serial T Cell  
313 Interactions with Antigen-Presenting Cells. *Immunity* **38**, 237–49 (2013).
- 314 26. Lodygin, D. *et al.* A combination of fluorescent NFAT and H2B sensors uncovers dynamics of T cell  
315 activation in real time during CNS autoimmunity. *Nat. Med.* **19**, 784–90 (2013).
- 316 27. Spencer, S. L. & Sorger, P. K. Measuring and modeling apoptosis in single cells. *Cell* **144**, 926–39  
317 (2011).
- 318 28. Callen, E. *et al.* 53BP1 mediates productive and mutagenic DNA repair through distinct  
319 phosphoprotein interactions. *Cell* **153**, 1266–1280 (2013).
- 320 29. Halle, S. *et al.* In Vivo Killing Capacity of Cytotoxic T Cells Is Limited and Involves Dynamic  
321 Interactions and T Cell Cooperativity. *Immunity* **44**, 233–245 (2016).
- 322 30. Zheng, X. *et al.* Cardiomyocytes display low mitochondrial priming and are highly resistant

- 323 toward cytotoxic T-cell killing. *Eur. J. Immunol.* **46**, 1415–1426 (2016).
- 324 31. Hoffmann, P. *et al.* Serial killing of tumor cells by cytotoxic T cells redirected with a CD19-/CD3-  
325 bispecific single-chain antibody construct. *Int. J. Cancer* **115**, 98–104 (2005).
- 326 32. Frankel, S. R. & Baeuerle, P. A. Targeting T cells to tumor cells using bispecific antibodies. *Curr.*  
327 *Opin. Chem. Biol.* **17**, 385–392 (2013).
- 328 33. Chmielewski, M., Hombach, A. A. & Abken, H. Of CARs and TRUCKs: Chimeric antigen receptor  
329 (CAR) T cells engineered with an inducible cytokine to modulate the tumor stroma. *Immunol.*  
330 *Rev.* **257**, 83–90 (2014).
- 331 34. Melero, I., Grimaldi, A. M., Perez-Gracia, J. L. & Ascierto, P. A. Clinical development of  
332 immunostimulatory monoclonal antibodies and opportunities for combination. *Clin. Cancer Res.*  
333 **19**, 997–1008 (2013).
- 334 35. Sharma, P. & Allison, J. P. Immune checkpoint targeting in cancer therapy: Toward combination  
335 strategies with curative potential. *Cell* **161**, 205–214 (2015).
- 336 36. Thurber, G. M. *et al.* Single-cell and subcellular pharmacokinetic imaging allows insight into drug  
337 action in vivo. *Nat. Commun.* **4**, 1504 (2013).

338

339

340 **Supplementary Information** is linked to the online version of the paper at  
341 [www.nature.com/nature](http://www.nature.com/nature).

342

### 343 **Acknowledgements**

344 This work was supported by the Dutch Cancer Foundation (KWF 2008-4031) to C.G.F. and  
345 P.F., NWO-Rubicon (019.162LW.020) to BW, a personal KWF grant to AdB), the FP7 of the  
346 European Union (ENCITE HEALTH TH-15-2008-208142), NWO-VICI (918.11.626), the  
347 European Research Council (617430-DEEPINSIGHT), and the Cancer Genomics Cancer, The  
348 Netherlands to P.F.. Time-lapse confocal microscopy was enabled by an NWO investment grant  
349 (834.13.003). We thank Stephen P. Schoenberger for providing the MEC-1/OVA cell line.

350

### 351 **Author contributions**

352 B.W., P.F. designed the experiments, interpreted the data and wrote the paper. A.d.B. designed  
353 and performed experiments, B.W., E.W., quantitatively analyzed the data, K.B. isolated,  
354 characterized and cultured the human SMCY.A2 CTL, J.T. and R.d.B performed mathematical  
355 analyses, H.D. and C.F. contributed to data interpretation. All authors read and corrected the  
356 manuscript.

357

## 358 **Author Information**

359 Reprints and permissions information is available at [www.nature.com/reprints](http://www.nature.com/reprints). The authors  
360 declare no competing financial interests. Correspondence and requests for materials should be  
361 addressed to [peter.friedl@radboudumc.nl](mailto:peter.friedl@radboudumc.nl).

362

## 363 **Supplementary videos**

364 **Supplementary movie 1.** Serial killing of seven MEC-1/OVA target cells by one OT1 CTL (3D  
365 collagen assay). Time, hours:min. Field size 80 x 80  $\mu\text{m}$ .

366 **Supplementary movie 2.** B16F10/OVA mouse melanoma target cells cocultured with OT1  
367 CTL. Time, hours:min. Field size 340 x 280  $\mu\text{m}$ .

368 **Supplementary movie 3.** BLM human melanoma target cells cocultured with SMCY.A2 CTL.  
369 Time, hours:min. Field size 280 x 270  $\mu\text{m}$ .

370 **Supplementary movie 4.** B16F10/OVA target cell expressing the  $\text{Ca}^{2+}$  sensor GCaMP6s (Fire  
371 LUT) contacted by an OT1 CTL (green). A single short-lived  $\text{Ca}^{2+}$  event followed by target cell  
372 survival (part 1). Repetitive  $\text{Ca}^{2+}$  events preceding target cell apoptosis (part 2). Time,  
373 hours:min:sec. Field size 60 x 55  $\mu\text{m}$  (part 1), 60 x 45  $\mu\text{m}$  (part 2).

374 **Supplementary movie 5.** Confocal time sequence of B16F10/OVA target cell expressing the  
375 NLS-GFP reporter (green) and H2B-mCherry (red) during contact by OT1 CTL (unlabeled,  
376 brightfield channel), causing sequential NLS-GFP leakage events with or without apoptosis  
377 induction. Circles indicate leakage events. Time, hours:min. Field size 180 x 180  $\mu\text{m}$ .

378 **Supplementary movie 6.** Confocal time sequence of B16F10/OVA target cell expressing the  
379 53BP1trunc-Apple reporter (Fire LUT) attacked by OT1 CTL (unlabeled), causing 53BP1trunc-  
380 Apple focalization followed by resolution (part 1) or apoptosis induction (part 2). Arrowheads  
381 indicate DNA repair foci. Time, hours:min. Field size 60 x 60  $\mu\text{m}$  (part 1), 80 x 80  $\mu\text{m}$  (part 2).

382 **Supplementary movie 7.** Serial engagements of multiple OT1 CTL (green) with B16F10/OVA  
383 target cell expressing the  $\text{Ca}^{2+}$  sensor GCaMP6s (Fire LUT) followed by target cell apoptosis.  
384 Time, hours:min:sec. Field size 140 x 85  $\mu\text{m}$ .

385 **Supplementary movie 8.** Dynamic sublethal conjugations of tissue invading B16F10/OVA cells  
386 expressing Histone-2b-mCherry (Red) by OT1 CTL (dsRed2, green). Perfused blood vessels  
387 (Al750, blue), Collagen fiber (SHG, red). hours:min. Field size 220 x 90  $\mu\text{m}$ .

388 **Supplementary movie 9.** Serial engagements of multiple OT1 CTL (dsRed2, yellow) with  
389 invading B16F10/OVA target cells (H2B-mCherry nuclei, red) followed by apoptosis of several  
390 target cells after multiple CTL contacts. Perfused blood vessels (Al750, blue), Collagen fiber  
391 (SHG, cyan). Arrow heads indicate nuclear condensation as first sign of apoptosis. hours:min.  
392 Field size 220 x 170  $\mu\text{m}$ .

393 **Supplementary movie 10.** B16F10/OVA cells expressing the  $\text{Ca}^{2+}$  sensor GCaMP6s (Cyan/ Fire  
394 LUT) in the tumor rim, infiltrated by OT1 CTL (dsRed2, green). CTL conjugation cause  
395 sublethal hits in few tumor cells. Perfused blood vessels (Al750, blue), Collagen fiber (SHG,  
396 red). Circles indicate  $\text{Ca}^{2+}$  events. hours:min:sec. Field size 330 x 330  $\mu\text{m}$ .

397 **Supplementary movie 11.** Tissue invading B16F10/OVA cells expressing the  $\text{Ca}^{2+}$  sensor  
398 GCaMP6s (Cyan/ Fire LUT) serially contacted by OT1 CTL (dsRed2, green). Dynamic CTL  
399 conjugations cause repetitive  $\text{Ca}^{2+}$  events in a high percentage of tumor cells. Perfused blood  
400 vessels (Al750, blue), Collagen fiber (SHG, red). Circles indicate  $\text{Ca}^{2+}$  events. hours:min:sec.  
401 Field size 160 x 120  $\mu\text{m}$ .

**Figure 1**

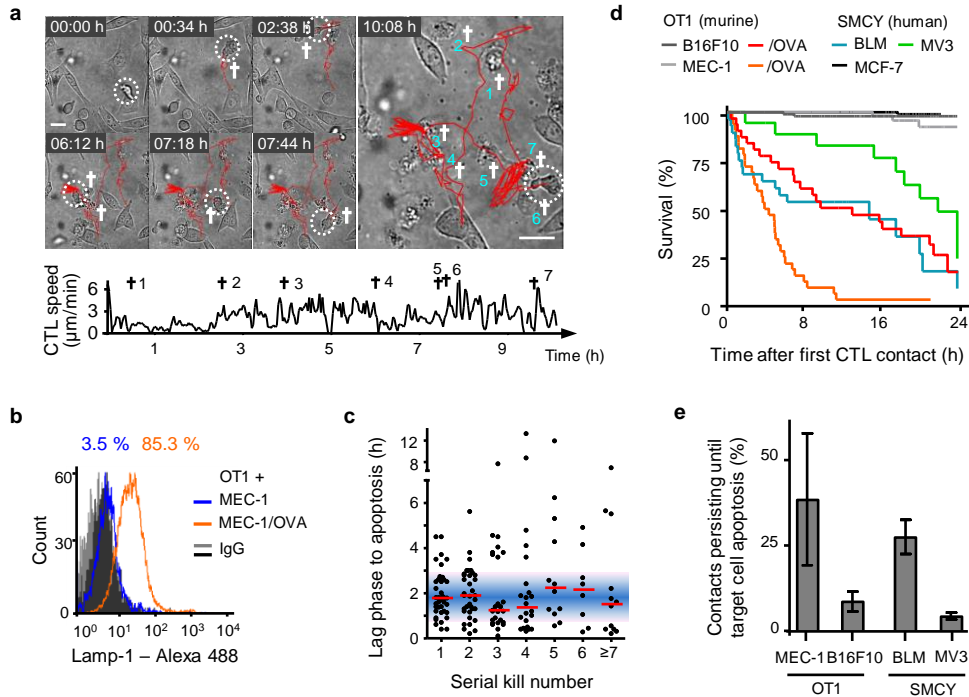

**Figure 1. CTL serial conjugation and effector function.** **a**, Time-lapse sequence and migration track of one OT1 CTL killing 7 MEC-1/OVA target cells sequentially within 11 h. Circles, CTL; cross, apoptotic target cell; scale bar, 20μm. **b**, Lamp-1 expression at the surface of OT1 CTL after 24-h of 3D coculture with MEC-1/OVA cells. Representative example of 3 independent experiments. **c**, Lag-phase until apoptosis of consecutive kills by the same CTL (43 CTL from 8 independent experiments). Red bars, median. **d**, Population survival of 4 distinct antigen-dependent target and 3 control models. Quantifications from 3 independent experiments for each cell line. **e**, Inefficiency of inducing apoptosis by individual CTL contacts in OT-1 and SMCY.A2 CTL models. Error bars, mean ± SD (≥ 100 contacts from ≥ 3 independent experiments per cell model).

**Figure 2**

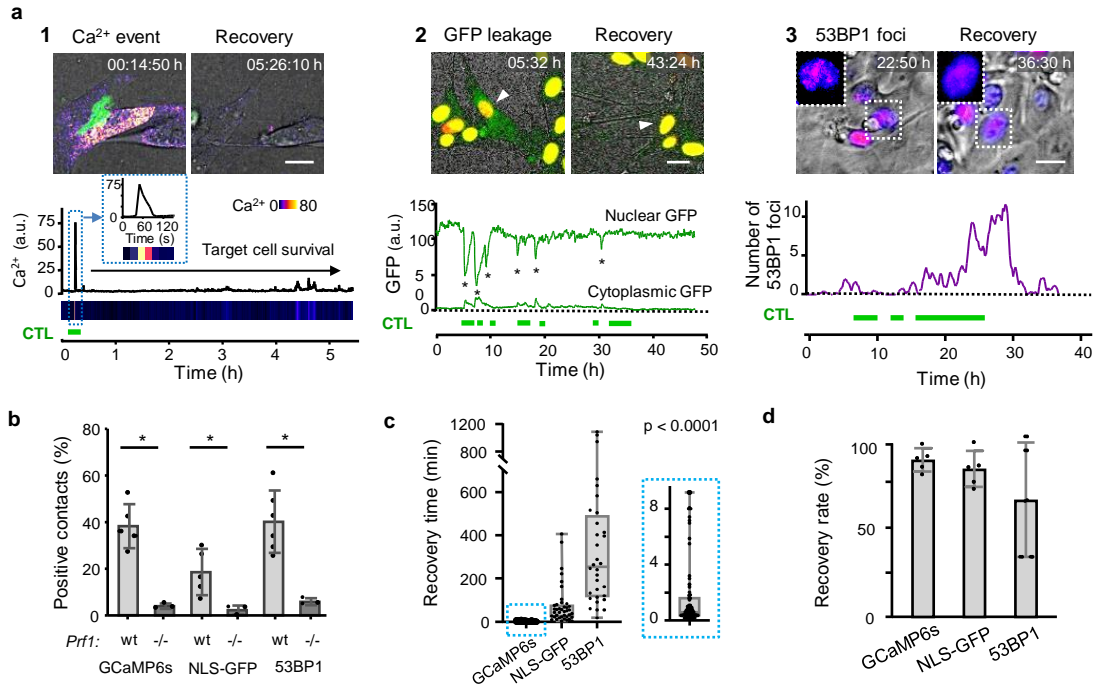

**Figure 2. Sublethal damage induced by CTL.** **a**, Reporter strategies. Green horizontal bars, duration of CTL contacts. Panel 1: CTL-mediated perforin pores visualized as Ca<sup>2+</sup> influx into B16F10/OVA target cells using the GCaMP6s reporter. Time-resolved intensity plot of GCaMP6s event in the target cell cytosol followed by survival. Green, OT1 CTL (GFP); Fire LUT, Ca<sup>2+</sup> level (GCaMP6s). Panel 2: CTL-mediated structural damage of the nuclear lamina monitored as NLS-GFP leakage into the cytosol. Nuclear and cytosolic GFP intensity plotted over time. Green, NLS-GFP; Red: Histone-2B-mCherry; Arrowhead: monitored cell. Asterisks, nuclear leakage events. Panel 3: CTL-mediated DNA damage response plotted as 53BP1trunc-Apple focalization in the nucleus over time. Fire LUT, 53BP1trunc-Apple. Insets, zooms of reversibility of 53BP1 foci. Bars, 10  $\mu$ m. **b**, Percentage of contacts of wt and perforin-deficient CTL with B16F10/OVA cells inducing Ca<sup>2+</sup> events, NLS-GFP cytosolic leakage and 53BP1trunc-Apple foci in target cells. Data show the mean  $\pm$  SD from independent experiments: 3 (GCaMP6s/wt, NLS-GFP/wt/prf1<sup>-/-</sup>), 5 (53BP1trunc-Apple/wt) and triplicate movies from 1 experiment (GCaMP6s/prf1<sup>-/-</sup>, NLS-GFP/prf1<sup>-/-</sup>). \*, p value < 0.05, two-tailed Mann-Whitney test comparing wt and prf1<sup>-/-</sup> datasets. **c**, Recovery times from initiation to termination of GCaMP6s, NLS-GFP and 53BP1trunc-Apple reporter activity. Box (25/75 percentile) and whiskers (minimum/maximum) of  $\geq$  32 cells (individual data points) from 3 (NLS-GFP, GCaMP6s) and 5 (53BP1trunc-Apple) independent experiments. p value, Kruskal-Wallis test comparing all groups corrected by Dunn's multiple comparisons test. **d**, Percentage of cells with sublethal damage event which fully resolved. Data show the mean  $\pm$  SD (5 independent experiments per reporter).

**Figure 3**

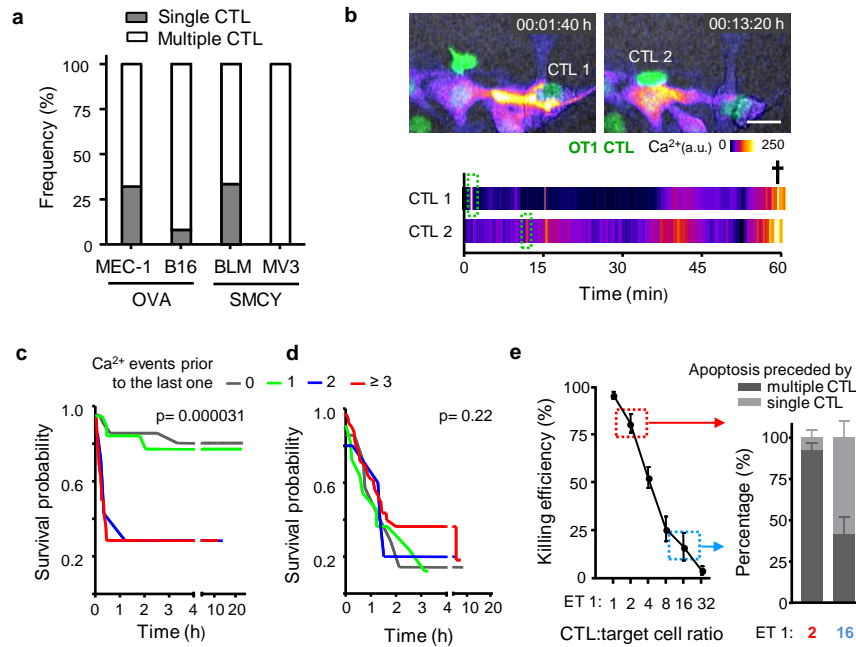

**Figure 3. Additive cytotoxicity.** **a**, Percentage of multiple contacts preceding apoptosis in murine and human melanoma models. Pooled data representing  $\geq 100$  contacts from  $\geq 3$  independent experiments per cell line. **b**, Time-lapse sequence and intensity plot of multiple Ca<sup>2+</sup> events followed by target cell apoptosis. Green fluorescence, OT1 CTL (dsRed); Fire LUT, Ca<sup>2+</sup> intensity (GCaMP6s). Cross, target cell death; Scale bar, 20  $\mu$ m. **c**, Survival probability of B16F10/OVA cells having received increasing numbers of Ca<sup>2+</sup> events. **d**, Simulation of stochastic apoptosis induction by permutation of waiting times between Ca<sup>2+</sup> events, survival and lag times until apoptosis. p-values in (c, d), log rank test comparing all groups. **e**, Killing efficacy of B16F10/OVA cells and percentage of preceding single or multiple interacting CTL in dependence of ET ratio. Left panel, means and SD from 3 independent experiments; right panel, 110 contacts from 4 independent experiments per ET ratio.



**Figure 4**

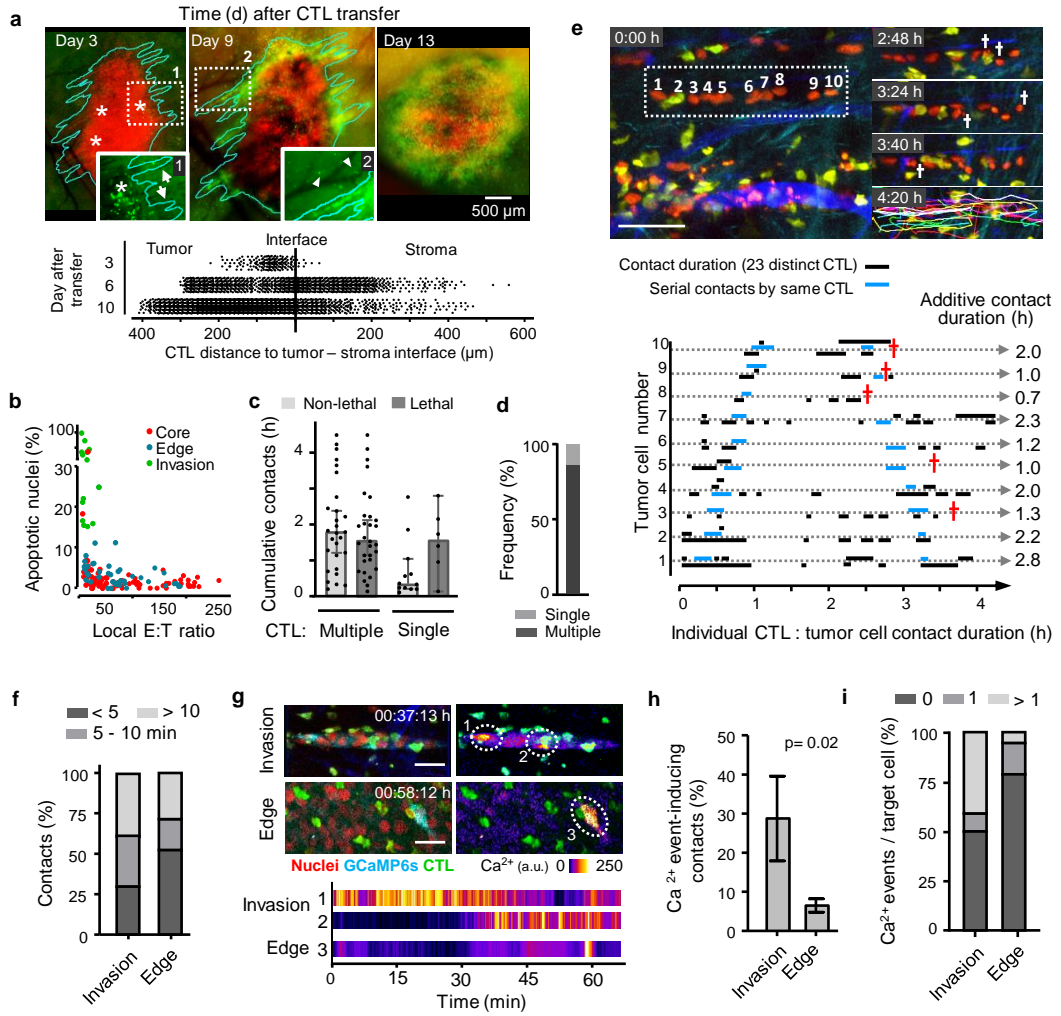

## Figure 4

**Figure 4. Additive cytotoxicity in live tumors.** **a**, Time-dependent CTL accumulation along the tumor-stroma interface. Red, nuclei B16F10/OVA cells; green: OT1 CTL. Lower panel, position of individual CTL. Representative example of one tumor. **b**, Correlation of CTL density and apoptotic frequency in tumor subregions. Pooled data, 8 independent mice. **c**, Cumulative contact duration and outcome of single or multiple CTL contacting B16F10/OVA cells. **d**, Frequency of apoptosis induction by single or multiple CTL. Data in (c, d) represent 40 non-lethal and 37 apoptotic events from 150 h of movies pooled from 20 independent tumors. **e**, Representative micrographs and quantification of serial engagements of multiple CTL with B16F10/OVA cells and outcome. Red cross, target cell apoptosis. 10 target cells from one tumor. **f**, Percentage of contacts between CTL with B16F10/OVA cells and duration category in the invasion zone versus tumor edge. **g**, Images from time-lapse recordings of GCaMP6s activity in B16F10/OVA target cells in distinct tumor subregions. Dotted circles indicate the example areas plotted for GCaMP6s intensity in the graph below. **h**, Percentage of CTL contacts which induced one or more  $\text{Ca}^{2+}$  events in invasion zones versus CTL-rich subregions at the tumor edge. **i**, Percentage of tumor cells receiving none, one or more than one  $\text{Ca}^{2+}$  event within a cumulative observation time of 3 h per tumor subregion. Data in (f, h, i) represent 228 contacts from 4 independent mice. Data in (h), mean  $\pm$  SD (3 positions per subregion from 4 independent mice). Scale bars (e,g), 50  $\mu\text{m}$ .

## Extended Data Figure 1

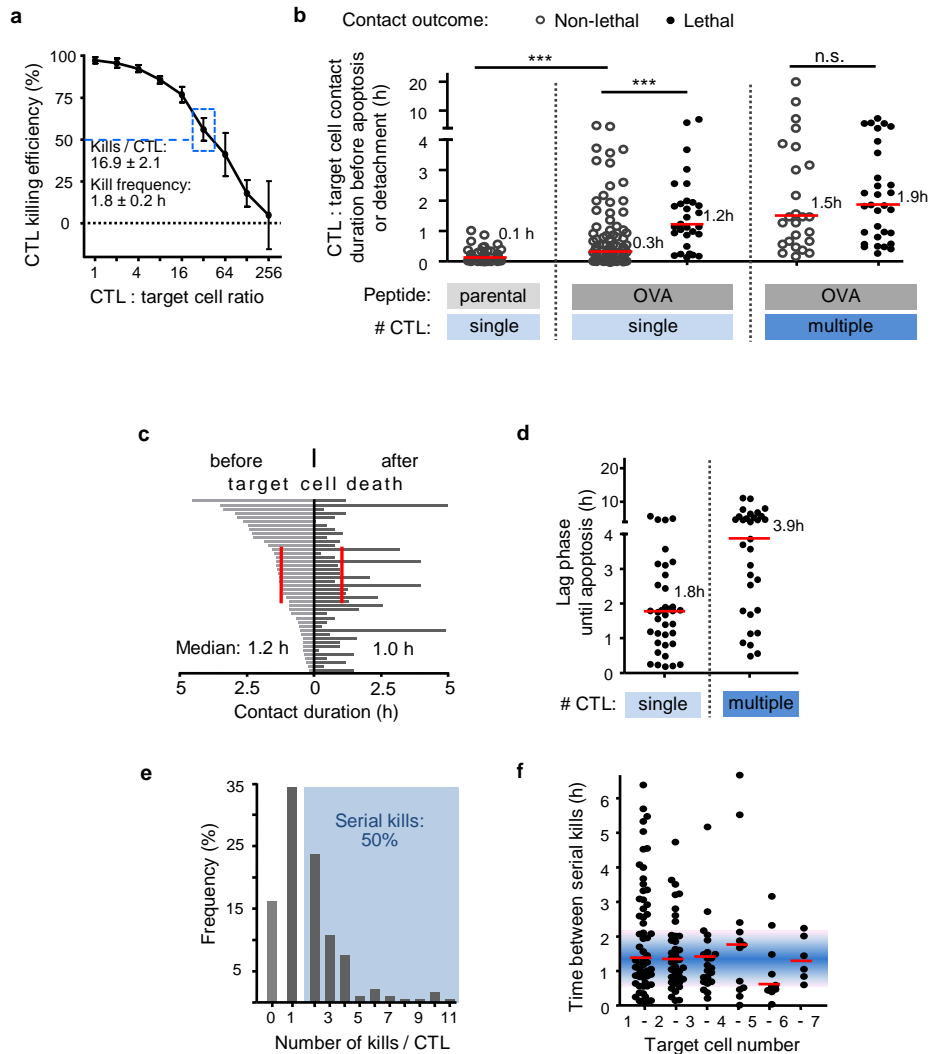

**Extended data figure 1. CTL contact phases, types and duration in MEC-1/OVA model.** **a**, Killing of MEC-1/OVA targets by OT1 CTL at different ET ratios, determined by flow cytometry after 24 h of co-culture. Data show means  $\pm$  SD (3 independent experiments). **b**, Cumulative contact duration between CTL and target cell and contact outcomes. **c**, Duration of CTL-target cell contacts before and after apoptosis. **d**, Lag phase until apoptosis of target cells induced by single or multiple CTL. **e**, Frequency of serial kills. **f**, Time between serial killing events mediated by the same CTL. \*\*\*  $p < 0.001$ ; n.s., not significant (two-tailed Mann-Whitney test). Red bars, median. Data in (**b-f**) were pooled from 9 independent experiments.

## Extended Data Figure 2

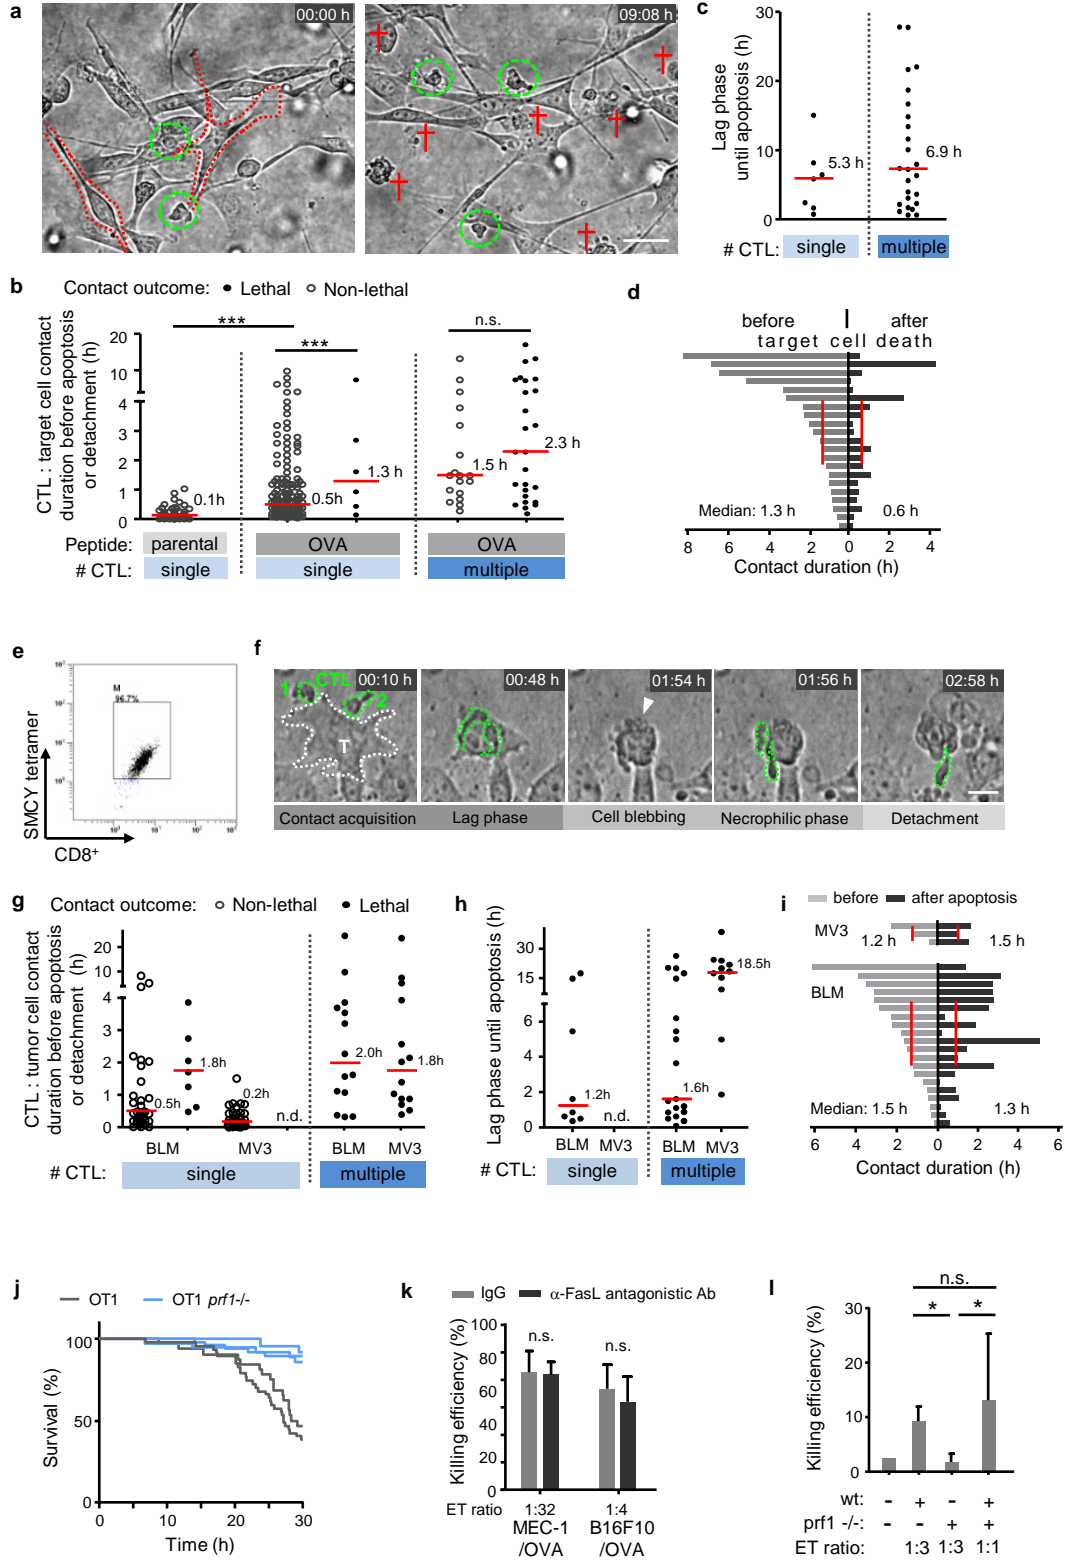

## Extended Data Figure 2

**Extended data figure 2. CTL effector function against mouse B16F10 and human MV3 and BLM melanoma cells.** **a**, Overview image of sub-confluent monolayer of B16F10/OVA with CTL in the 3D collagen matrix interface assay at consecutive time points. Green circles, CTL; red cross, apoptotic target cell. Scale bar, 50  $\mu\text{m}$ . **b**, Duration of contacts between individual and multiple CTL with B16F10/OVA target cells from initiation until apoptosis induction. **c**, Lag phase until apoptosis induced by contacts from single or multiple, sequentially engaged CTL. **d**, Duration of contact phases between individual CTL with target cell before and after target cell blebbing, obtained by manual tracking. Red lines, median. Data in (b-d) show 232 contacts pooled from 5 independent experiments. **e**, SMCY.A2 tetramer / CD8 double staining confirming CTL specificity and purity of > 95%. **f**, Time-lapse sequence of two simultaneously engaging CTL with human BLM melanoma target cell followed by target-cell apoptosis. Arrowhead, blebbing target cell during death. Scale bar, 20  $\mu\text{m}$ . **g**, SMCY.A2 CTL contact durations with BLM and MV3 melanoma targets and contact outcome. n.d., not detected. **h**, Lag phase until apoptosis induced by single or multiple CTL. **i**, CTL contact duration with the same target cell before and after target cell blebbing. Red bars, median. Data in (g-i) show 50 (MV3) and 53 (BLM) contacts pooled from 3 (MV3) and 4 (BLM) independent experiments. **j**, CTL-mediated killing efficiency of B16F10/OVA cells by wild-type (wt) and perforin-deficient (prf1 -/-) OT1 CTL in 3D culture. Data acquisition and analyses as in Fig. 1d. Data show duplicates of one experiment. **k**, CTL killing efficiency upon blocking FasL by  $\alpha$ -FasL Ab (MFL4) (10 $\mu\text{g}/\text{ml}$ ). Data represent the means  $\pm$  SD (n=3). n.s., non-significant (two-tailed Mann-Whitney test). **l**, B16F10/OVA Histone-2B-mCherry / NLS-GFP cocultures with wild type (wt) and mixed, wt and prf1 -/- OT1 CTL were monitored for 40 h by confocal time-lapse microscopy. Readout of CTL-mediated apoptosis induction was achieved by manual analysis of nuclear condensation and fragmentation. Data represent the means  $\pm$  SD (3 independent experiments). \*,  $p < 0.01$ .

### Extended Data Figure 3

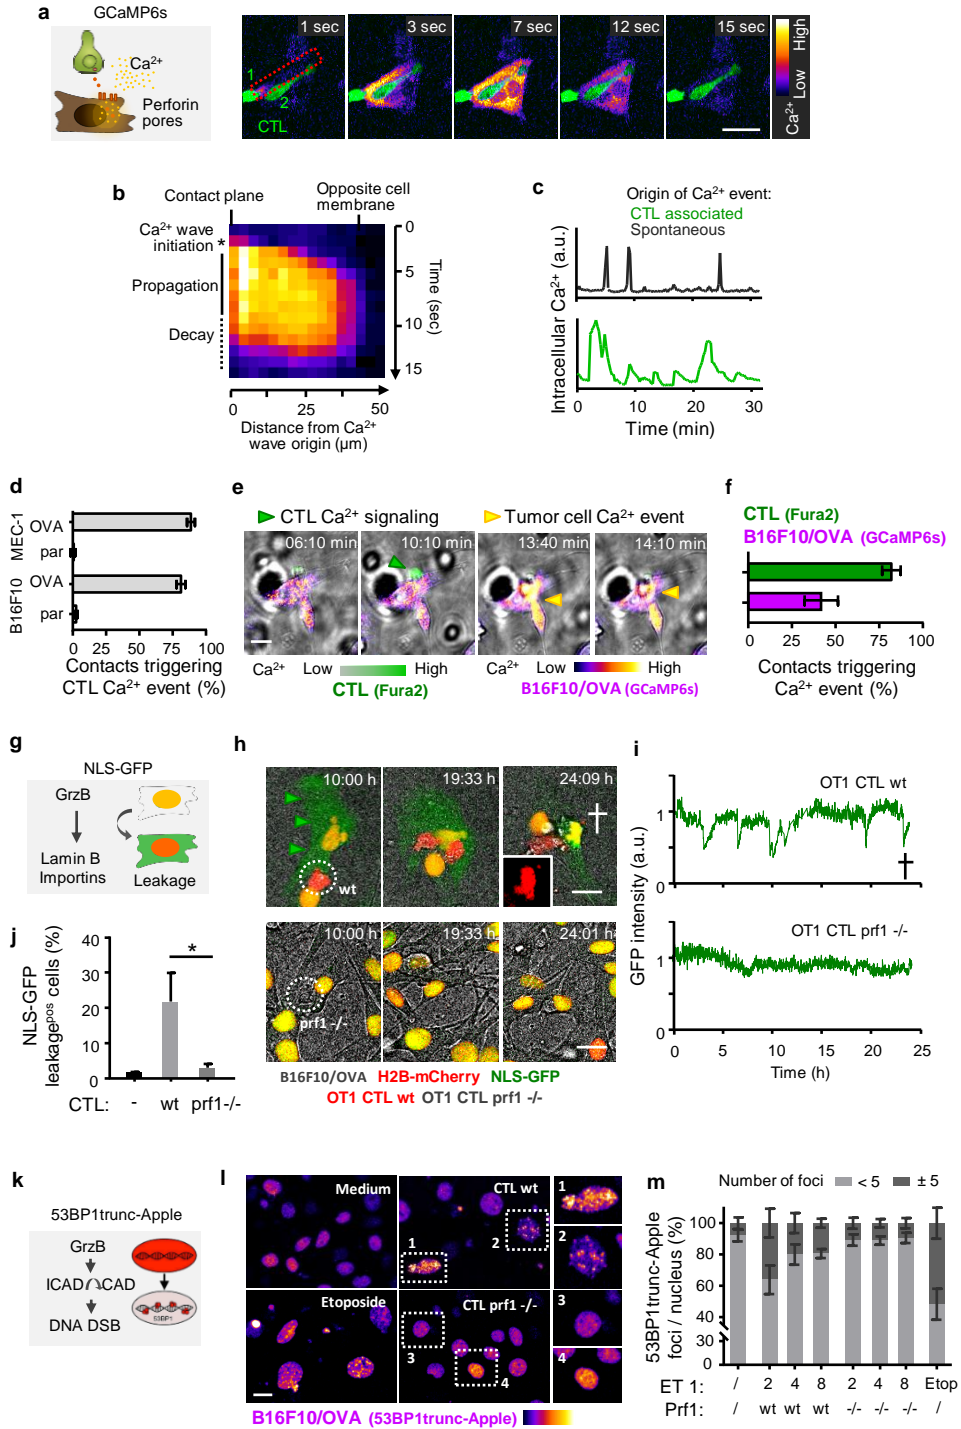

### Extended Data Figure 3

**Extended Data Figure 3: CTL-mediated sublethal damage kinetics.** **a**, Principle of reporter assay (cartoon, left) and time-lapse sequence of OT1 CTL (green) associated  $\text{Ca}^{2+}$  event (Fire LUT) in MEC-1/OVA target cell. Frame rate: 1 sec. **b**,  $\text{Ca}^{2+}$  influx originating at the CTL-target cell contact plane and propagating through the target cell cytoplasm. **c**, Representative example of amplitude and duration of CTL-associated calcium events compared with spontaneous intracellular  $\text{Ca}^{2+}$  fluctuations in the absence of contacting CTL. **d**, Percentage of CTL contacts associated with  $\text{Ca}^{2+}$  events in OVA expressing target cells (OVA) compared to OVA negative parental (par) cells. Data show the means  $\pm$  SD from 3 independent experiments. **e**, Image sequence of Fura2-labeled OT1 CTL during contact with GCaMP6s expressing B16F10/OVA cell. Arrowheads: green, Fura2-positive event; yellow, GCaMP6s-positive event. **f**, Percentage of contacts triggering  $\text{Ca}^{2+}$  events in OT-1 CTL or B16F10/OVA target cells, respectively. Quantification was performed by manual analysis from 78 contacts (4 independent experiments). **g**, Principle of the NLS-GFP reporter for monitoring sublethal damage. Abbreviations: GrzB, Granzyme B; Yellow nucleus resulting from overlapping emission of NLS-GFP and H2B-mCherry in the nucleus; red nucleus, persisting H2B signal after leakage of NLS-GFP into the cytoplasm. **h**, Representative image sequence of wt and *prf1*<sup>-/-</sup> OT1 CTL interacting with NLS-GFP expressing target cells. Dotted circle, CTL; white cross, target cell apoptosis; inset, condensed, apoptotic nucleus (H2B-mCherry). **i**, NLS-GFP signal intensity measured in the nucleus over time and outcome. The GFP signal was divided by the H2B-mCherry signal to normalize for focus drifts which affect signal intensity. Cross, nuclear fragmentation. **j**, Percentage of NLS-GFP leakage events in cultures without or with wt or *prf1*<sup>-/-</sup> OT1 CTL. Data show the means  $\pm$  SD (3 independent experiments). **k**, Principle of the 53BP1trunc-Apple DNA damage reporter. Abbreviations: GrzB, Granzyme B; ICAD/CAD, Inhibitor of Caspase-activated DNase; DNA DSB, DNA double-strand breaks; **l**, Representative micrographs of 53BP1trunc-Apple expressing B16F01/OVA after incubation for 48 h with medium, Etoposide (25  $\mu\text{g/ml}$ ), or in coculture with wt or *prf1*<sup>-/-</sup> OT1 CTL at ET ratio of 1:4. Zoomed images, nuclei with or without 53BP1trunc-Apple foci. **m**, Percentage of 53BP1trunc-Apple expressing B16F10/OVA cells showing  $<5$  or  $\geq 5$  53BP1trunc-Apple foci per nucleus after 48 h culture under different conditions. Foci per nucleus were counted using a custom ImageJ/FIJI script to segment nuclei based on Hoechst counterstaining as the number of maxima per nucleus (Find Maxima plugin). Data show the means  $\pm$  SD (duplicates from 3 independent experiments). Scale bars, 20  $\mu\text{m}$ .

### Extended Data Figure 4

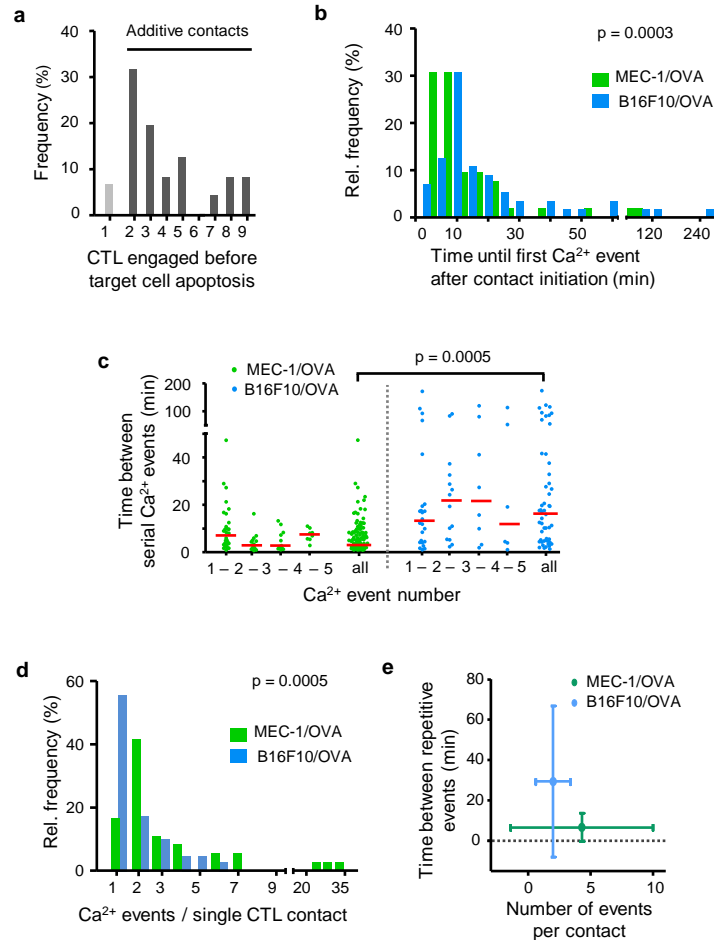

**Extended data figure 4. Kinetics and frequency of CTL-induced sublethal events. a,** Percentage of CTL engaged before target cell death in B16F10/OVA coculture with OT1 CTL. **b,** Lag phase until first Ca<sup>2+</sup> event after contact initiation in MEC-1/OVA and B16F10/OVA target cells. Data from 55 (B16F10) and 52 (MEC-1) Ca<sup>2+</sup> events. p value, two-tailed Mann-Whitney test. **c,** Intervals between sequential Ca<sup>2+</sup> events in the target cell induced by the same CTL in one single contact. Medians were 4 min (MEC-1/OVA) and 18 min (B16F10/OVA). Red line, median. Data show 53 (B16F10) and 119 (MEC-1) Ca<sup>2+</sup> events. **d,** Number of Ca<sup>2+</sup> events associated with the same CTL. Data show 55 (B16F10) and 36 (MEC-1) CTL. Data from (b-d) pooled from 3 (B16F10) and 2 (MEC-1) independent experiments. p values, two-tailed Mann-Whitney test. **e,** Number of Ca<sup>2+</sup> events per CTL contact plotted against frequency of repetitive Ca<sup>2+</sup> events in MEC-1/OVA cells compared to the B16F10/OVA cells. Data from 53 (B16F10) and 119 (MEC-1) Ca<sup>2+</sup> events pooled from 3 (B16F10/OVA) and 2 (MEC-1/OVA) independent experiments.



## Extended Data Figure 5

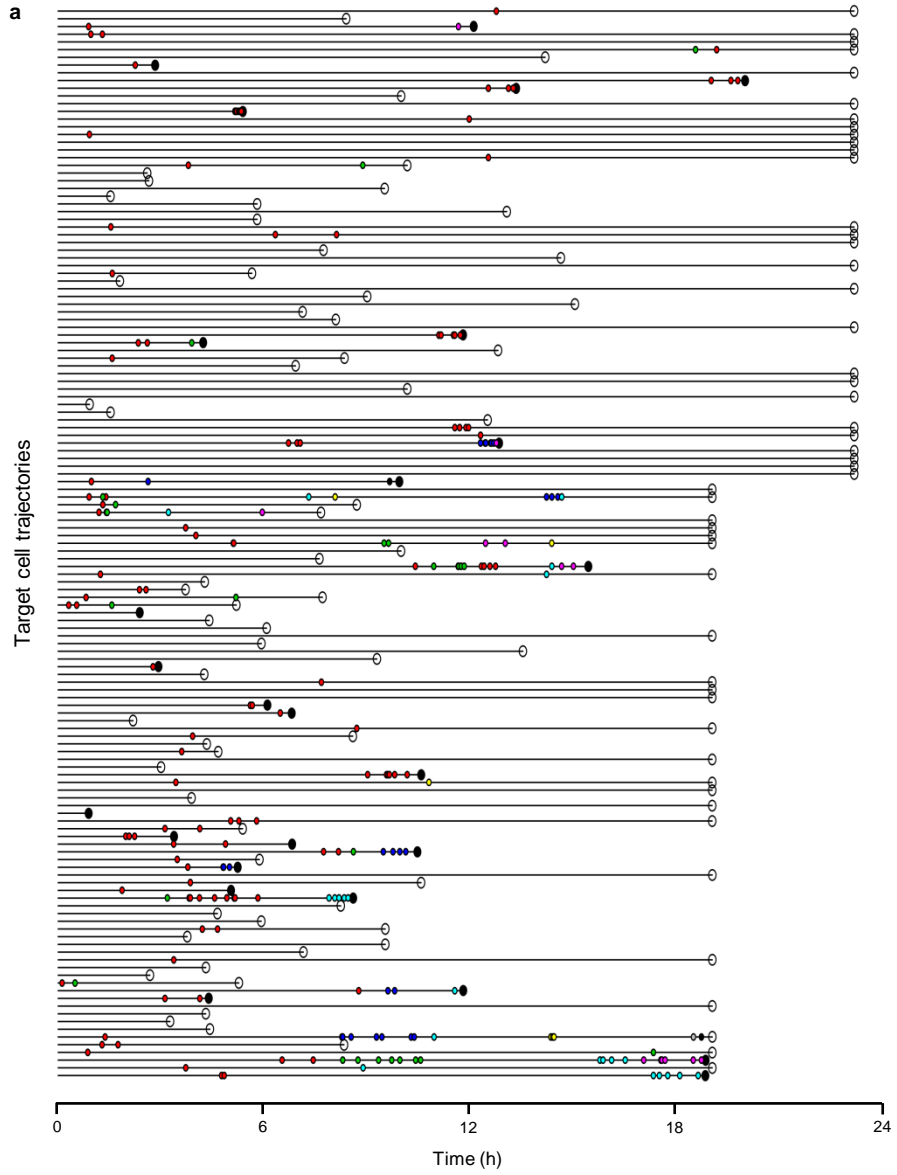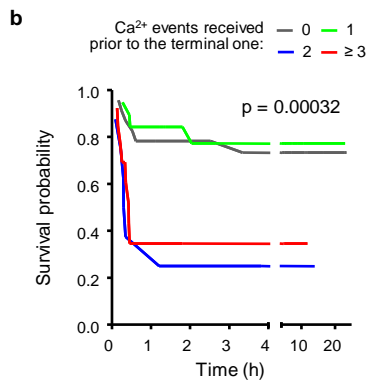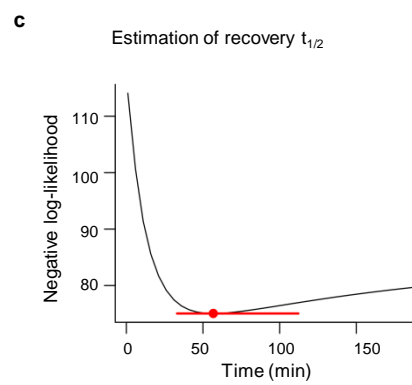

### Extended Data Figure 5

**Extended data figure 5. Statistical analysis. a,** Time-points of Ca<sup>2+</sup>-positive events (dots color-coded for CTL causing the event) in individual B16F10/OVA cells contacted by OT-1 CTL. Outcome of the interaction is indicated as lethal (filled black dot) or non-lethal (open circle) at the end of each trajectory. **b,** Survival probability of B16F10/OVA cells having received increasing numbers of Ca<sup>2+</sup> events prior to the terminal event after filtering redundant Ca<sup>2+</sup> events. p-values, log rank test comparing all groups. **c,** Estimation of damage recovery half-life in B16F10/OVA after one single Ca<sup>2+</sup> event by a statistical model that assumes additive killing (see Methods). Point and error bars: damage half-life that is most consistent with the data and 95% CI.

## Extended Data Figure 6.

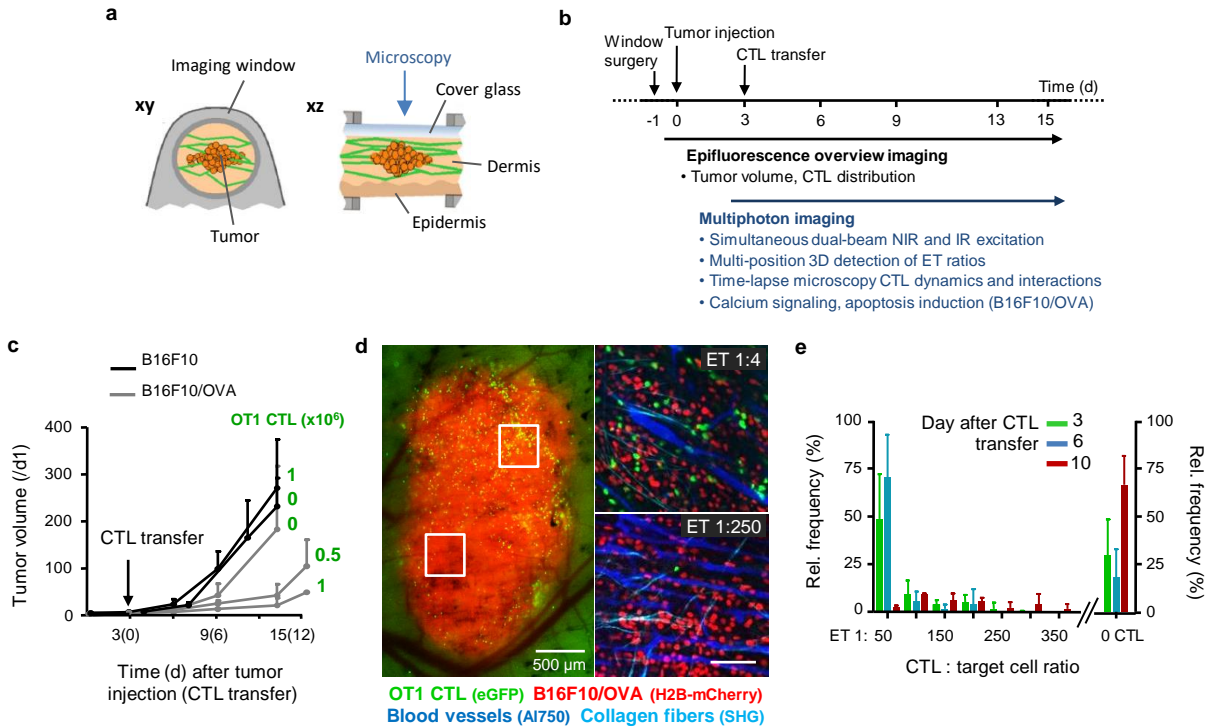

**Extended data figure 6. Intravital microscopy.** **a**, Dorsal skin-fold chamber setup and tumor model. **b**, Setup and time line, including tumor cell injection, CTL i.v. transfer, intravital monitoring and parameter extraction. **c**, Time-dependent impact of adoptive OT1 CTL transfer on B16F10 tumor volume based on measurements obtained from epifluorescence overviews. Error bars, means  $\pm$  SD (5 independent tumors). **d**, Tumor morphology and distribution of CTL monitored by epifluorescence detection through the skin window (left image) and multi-photon microscopy images (right images) recorded in different tumor subregions. Red, tumor nuclei (H2B/mCherry); green, OT1 CTL (eGFP); cyan, collagen fibers (SHG); blue, blood vessels (70kDa-dextran/Alexa750). **e**, Sub-regional quantification of ET ratios over time. Error bars, means  $\pm$  SD (8 independent tumors).

### Extended Data Figure 7.

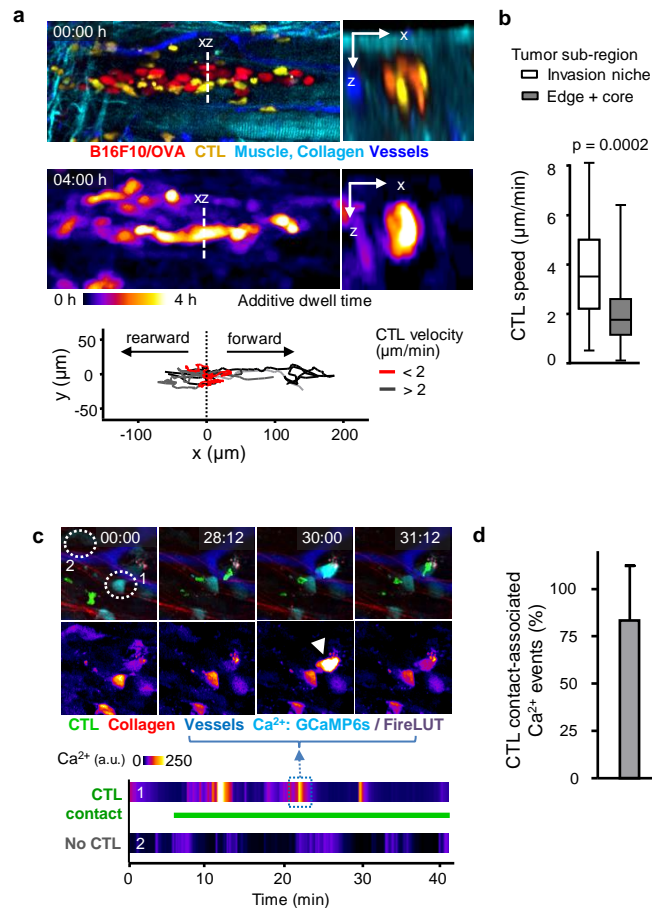

**Extended data figure 7. Monitoring dynamic cellular events by intravital time-lapse microscopy.** **a**, Distribution (top), dwell-time (middle) and migration tracks (bottom) after 4 h time-lapse recording (top) of CTL (yellow) between tumor cells (red) along channel-like invasion niche confined by collagen bundles (cyan) and blood vessels (blue). Data from one representative time-lapse recording. **b**, CTL migration speed in relation to tumor subregions. Data shows 34 (invasion) and 120 (tumor edge) CTL tracks from 3 independent experiments. p value, two-tailed Mann-Whitney test. **c**, Sequential intracellular  $\text{Ca}^{2+}$  events (GCaMP6s) in B16F10/OVA cell during CTL engagement. Time stamp, min:sec. Green, OT1 CTL; Cyan, GCaMP6s in B16F10/OVA; Lower panel: Fire LUT,  $\text{Ca}^{2+}$  intensity (GCaMP6s) of either contact indicated by number. **d**, Percentage of  $\text{Ca}^{2+}$  events associated with a CTL contact. Error bars, mean  $\pm$  SD, data from 47  $\text{Ca}^{2+}$  events from 4 independent mice.

### Extended Data Figure 8.

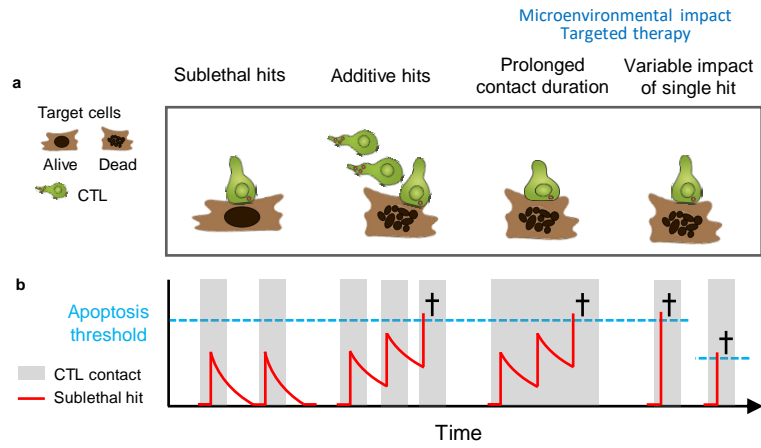

**Extended data figure 8. The concept of additive cytotoxicity.** (a) CTL-target cell contact types and outcome. (b) Predicted accumulation of cytotoxic but sublethal hits and recovery over time. Black cross, target cell apoptosis.
